# Supplementary material
Source: publisher figshare collection journal article supplement (https://acs.figshare.com/ndownloader/files/3933910)
Supplement: Supplementary file 1 [file 3933910]

**Supplemental Material for**

**Tar Reforming in Model Gasifier Effluents:  
Transition Metal / Rare Earth Oxide Catalysts**

*Rui Li <sup>a</sup>, Amitava Roy <sup>b</sup>, Joseph Bridges<sup>a</sup> and Kerry M. Dooley <sup>a\*</sup>,*

<sup>a</sup> Department of Chemical Engineering, Louisiana State University, Baton Rouge, LA  
70803, USA

<sup>b</sup> Center for Advanced Microstructures & Devices, Louisiana State University, 6980  
Jefferson Highway, Baton Rouge, LA 70806, USA

\*corresponding author: [dooley@lsu.edu](mailto:dooley@lsu.edu)

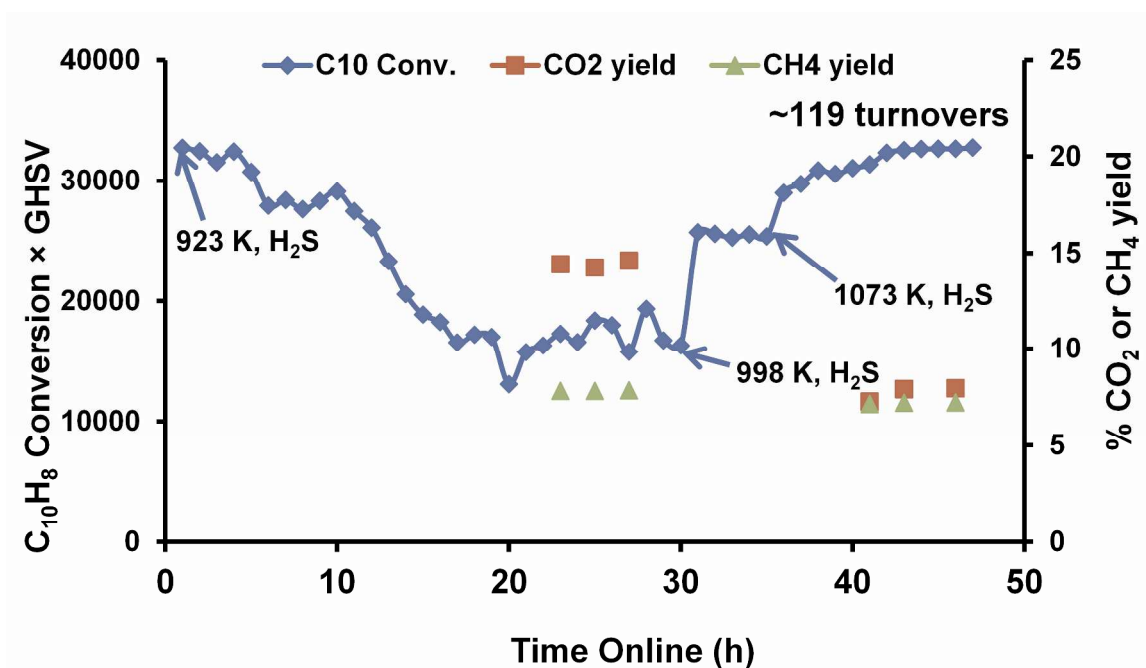

**Figure S1.** Tar reforming at 923 – 1073 K with Fe/Ce3/La/Al. Feed:  $H_2O$  9.1%,  $CO$  54.5%,  $CH_4$  4.1%,  $H_2$  30.9%,  $N_2$  1.07%,  $C_{10}H_8$  0.33%,  $H_2S$  40 ppm. Turnovers are calculated with respect to  $C_{10}H_8$  only.

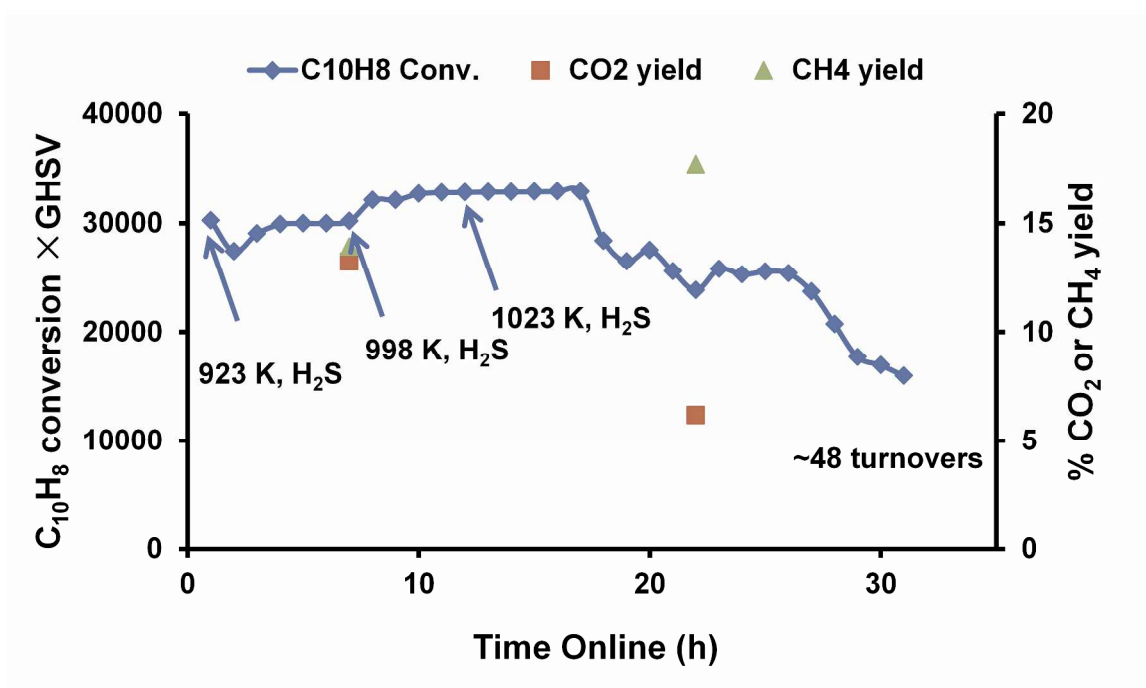

**Figure S2.** Tar reforming at 923 – 1073 K with Ni<sub>2</sub>/Ca/Mg<sub>2</sub>/Al. Feed: H<sub>2</sub>O 9.1%, CO 54.5%, CH<sub>4</sub> 4.1%, H<sub>2</sub> 30.9%, N<sub>2</sub> 1.07%, C<sub>10</sub>H<sub>8</sub> 0.33%, H<sub>2</sub>S 40 ppm. Turnovers are calculated with respect to C<sub>10</sub>H<sub>8</sub> only.

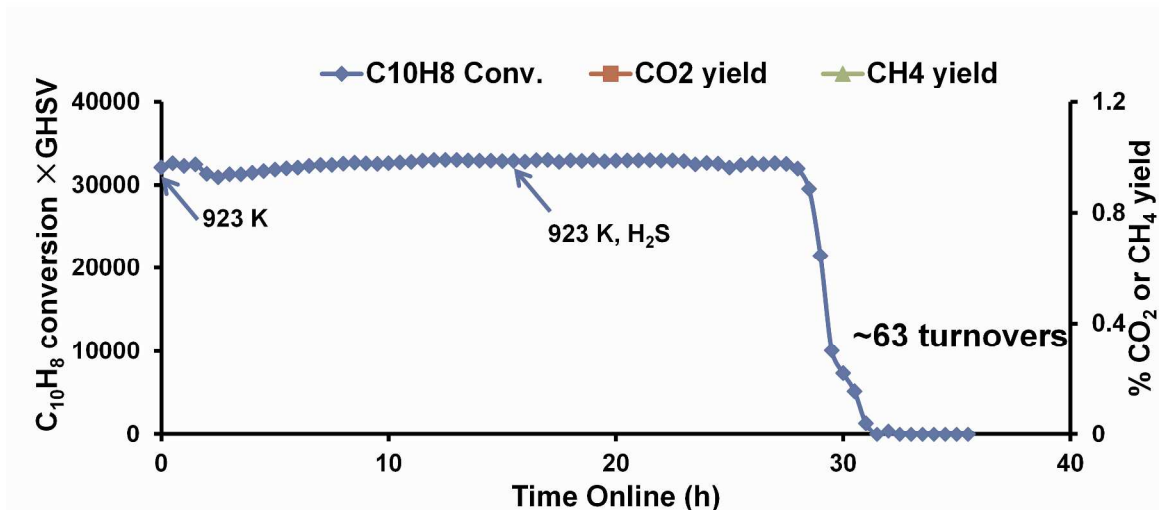

**Figure S3.** Tar reforming at 923 – 1073 K with Ni<sub>15</sub>/K/Mg<sub>4</sub>/Al. Feed: H<sub>2</sub>O 9.1%, CO 54.5%, CH<sub>4</sub> 4.1%, H<sub>2</sub> 30.9%, N<sub>2</sub> 1.07%, C<sub>10</sub>H<sub>8</sub> 0.33%, H<sub>2</sub>S 40 ppm. Turnovers are calculated with respect to C<sub>10</sub>H<sub>8</sub> only.

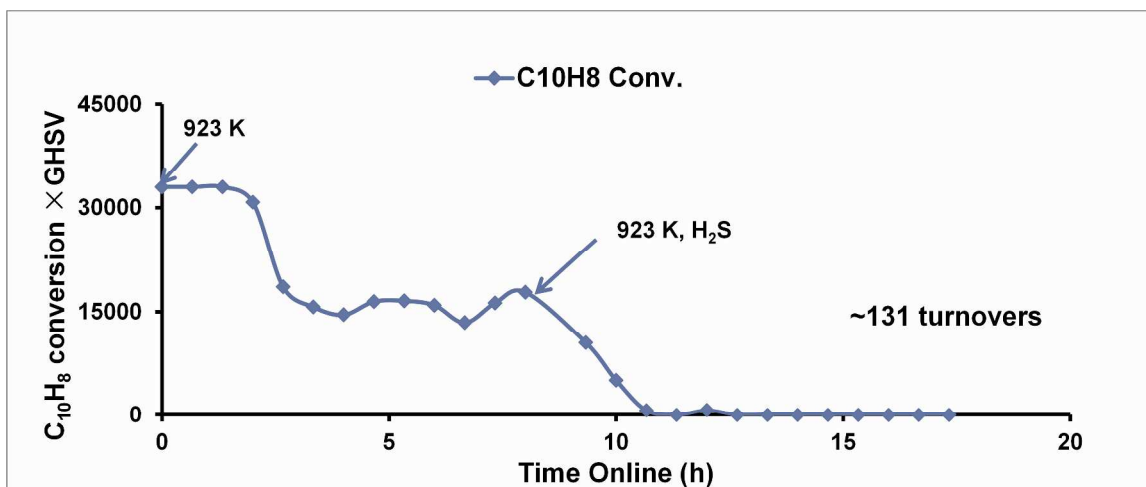

**Figure S4.** Tar reforming at 923 – 1073 K with Ni<sub>0.008</sub>/Mn<sub>0.003</sub>/Al. Feed: H<sub>2</sub>O 9.1%, CO 54.5%, CH<sub>4</sub> 4.1%, H<sub>2</sub> 30.9%, N<sub>2</sub> 1.07%, C<sub>10</sub>H<sub>8</sub> 0.33%, H<sub>2</sub>S 40 ppm. Turnovers are calculated with respect to C<sub>10</sub>H<sub>8</sub> only.

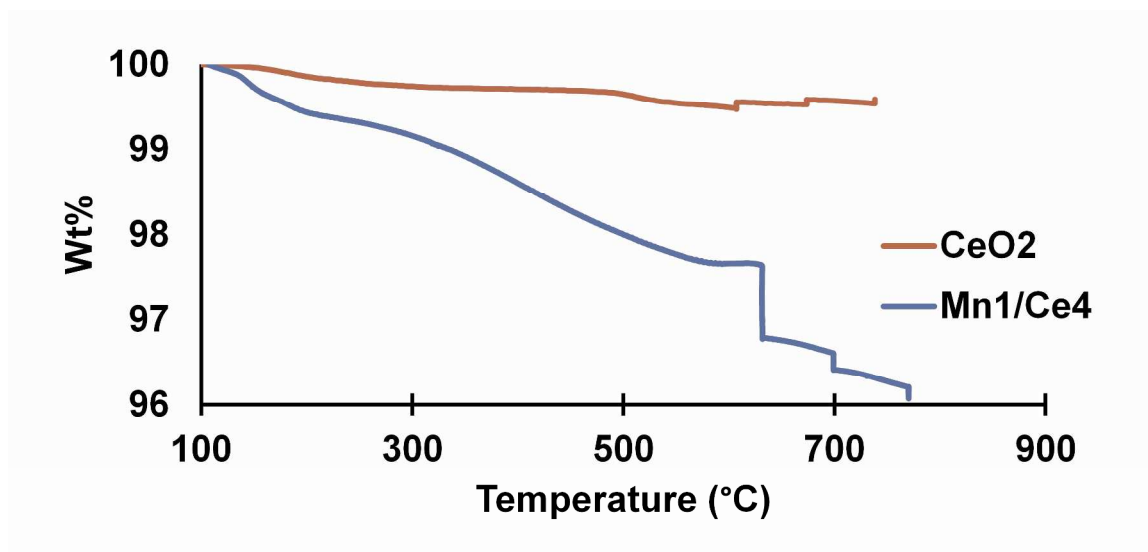

**Figure S5.** Weight loss in hydrogen temperature-programmed reduction of as-calcined (fresh) Mn<sub>1</sub>/Ce<sub>4</sub> and CeO<sub>2</sub>. The hold at 630°C was for 2 h, and at 740 and 770°C, 1 h.

The weight loss for Mn<sub>1</sub>/Ce<sub>4</sub> is equivalent to ~17% reduction on an oxygen atom basis (O lost/all O in the sample), much higher than that of CeO<sub>2</sub> (~2.7%).

**Table S1. Results of regression analysis for Ce L<sub>III</sub>-edge XAFS of reduced Fe/Ce<sub>3</sub>**

|                | Ce-O  | Ce-Ce/Fe    |
|----------------|-------|-------------|
| N              | 6.7   | 9.3/2.7     |
| R (Å)          | 2.27  | 3.77/3.75   |
| $\sigma^2$ (Å) | 0.014 | 0.009/0.009 |
| R-factor       | 0.06  |             |

**Table S2. Results of regression analysis for Fe K-edge XAFS of reduced Fe/Ce<sub>3</sub>**

|                | Fe-O | Fe-Fe/Ce   | Fe-Fe |
|----------------|------|------------|-------|
| N              | 6.4  | 2.6/9.3    | 8     |
| R (Å)          | 2.27 | 3.7/3.74   | 2.47  |
| $\sigma^2$ (Å) | 0.07 | 0.019/0.01 | 0.004 |
| R-factor       | 0.06 |            |       |

**Table S3. Results of regression analysis for Ce L<sub>III</sub>-edge XAFS of Mn1/Ce4, Ce-anion and Ce-cation shells**

|                |                       |             |             |
|----------------|-----------------------|-------------|-------------|
| sulfided       | Ce-O (S) <sup>1</sup> | Ce-Ce (Mn)  | Ce-O (S)    |
| N              | 6.4                   | 12          | 17.8        |
| R (Å)          | 2.33±0.02             | 3.86±0.02   | 4.37±0.08   |
| $\sigma^2$ (Å) | 0.010±0.002           | 0.006±0.002 | 0.016±0.031 |
| reduced        | Ce-O (S)              | Ce-Ce (Mn)  | Ce-O (S)    |
| N              | 6                     | 12          | 15          |
| R (Å)          | 2.33±0.03             | 3.88±0.02   | 4.39±0.04   |
| $\sigma^2$ (Å) | 0.015±0.004           | 0.004±0.003 | 0.003±0.021 |
| as calcined    | Ce-O (S)              | Ce-Ce (Mn)  | Ce-O (S)    |
| N              | 6.8                   | 12          | 18.2        |
| R (Å)          | 2.33±0.02             | 3.86±0.02   | 4.38±0.09   |
| $\sigma^2$ (Å) | 0.009±0.002           | 0.006±0.002 | 0.020±0.04  |
